# Supplementary material
Source: PubMed Central journal article supplement (PMC7102521)
Supplement: mmc2.pdf [file mmc2.pdf]

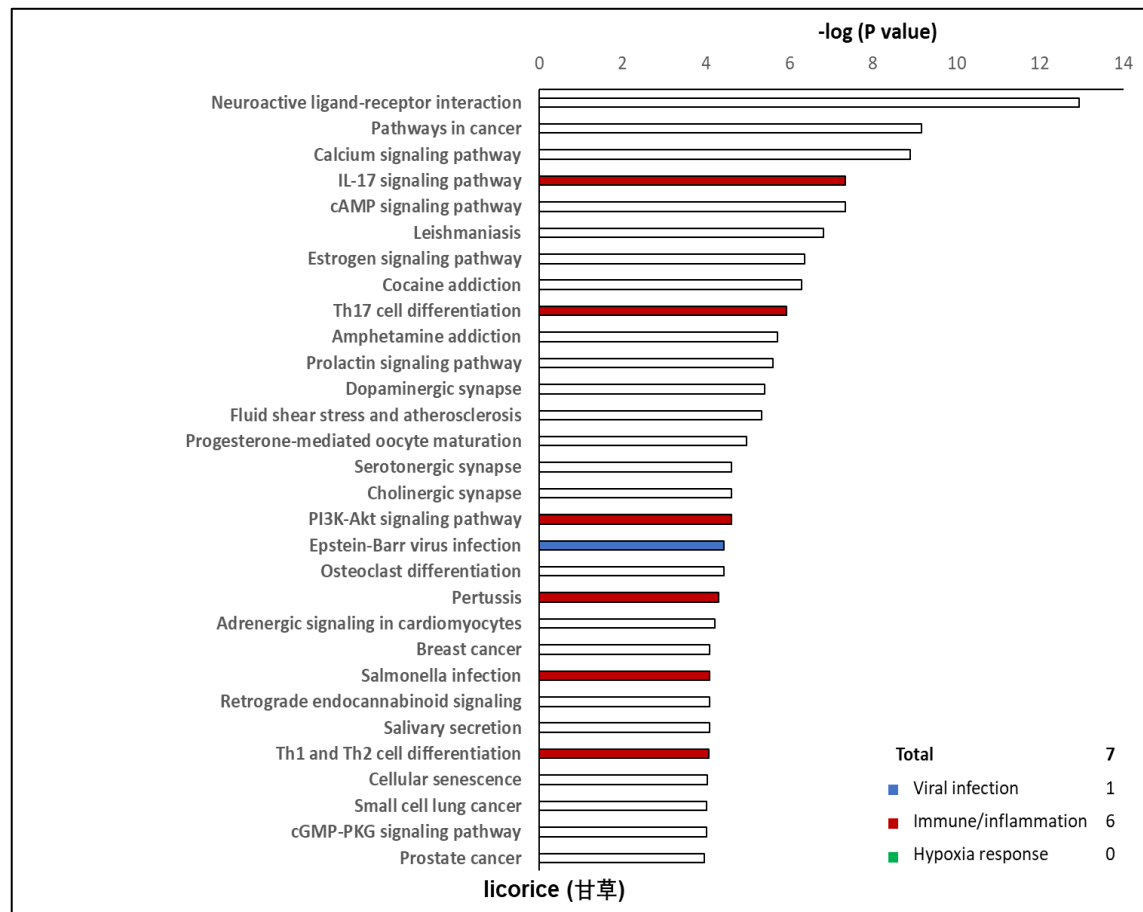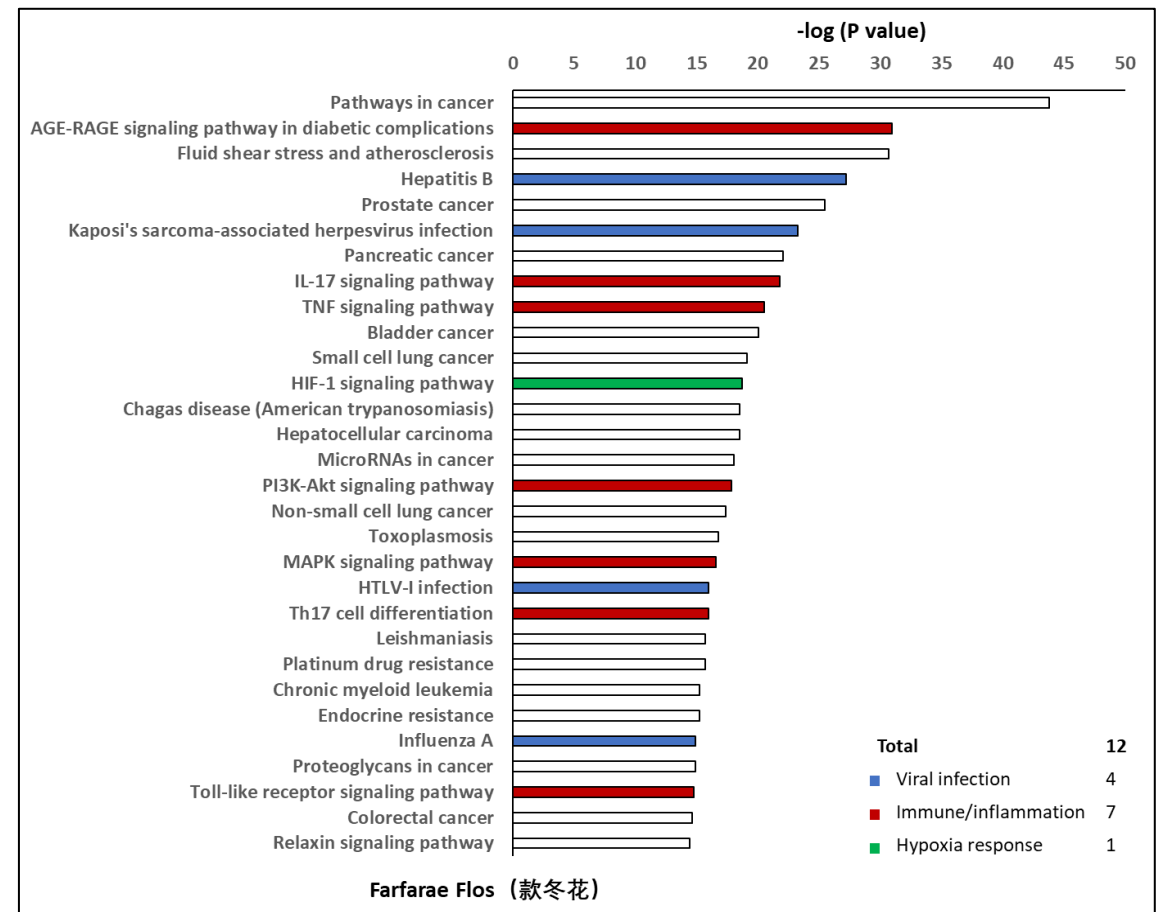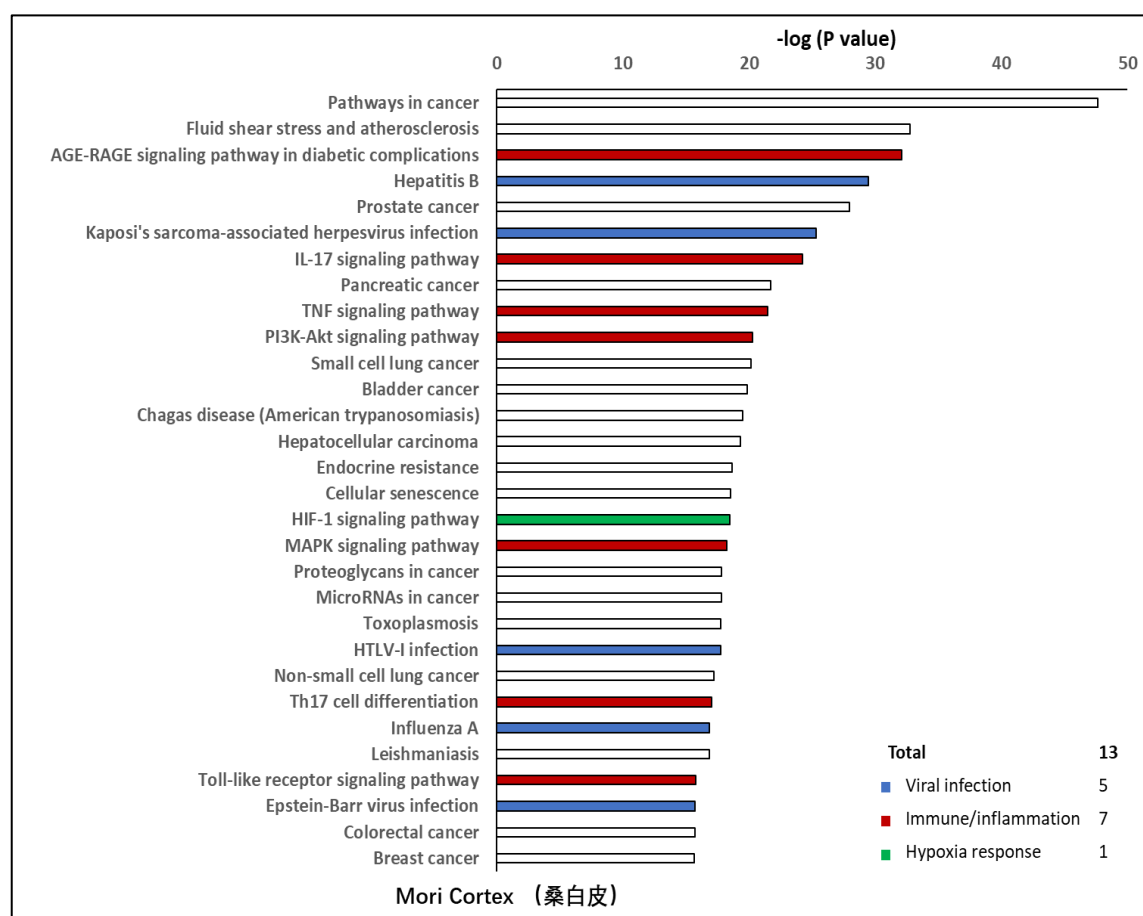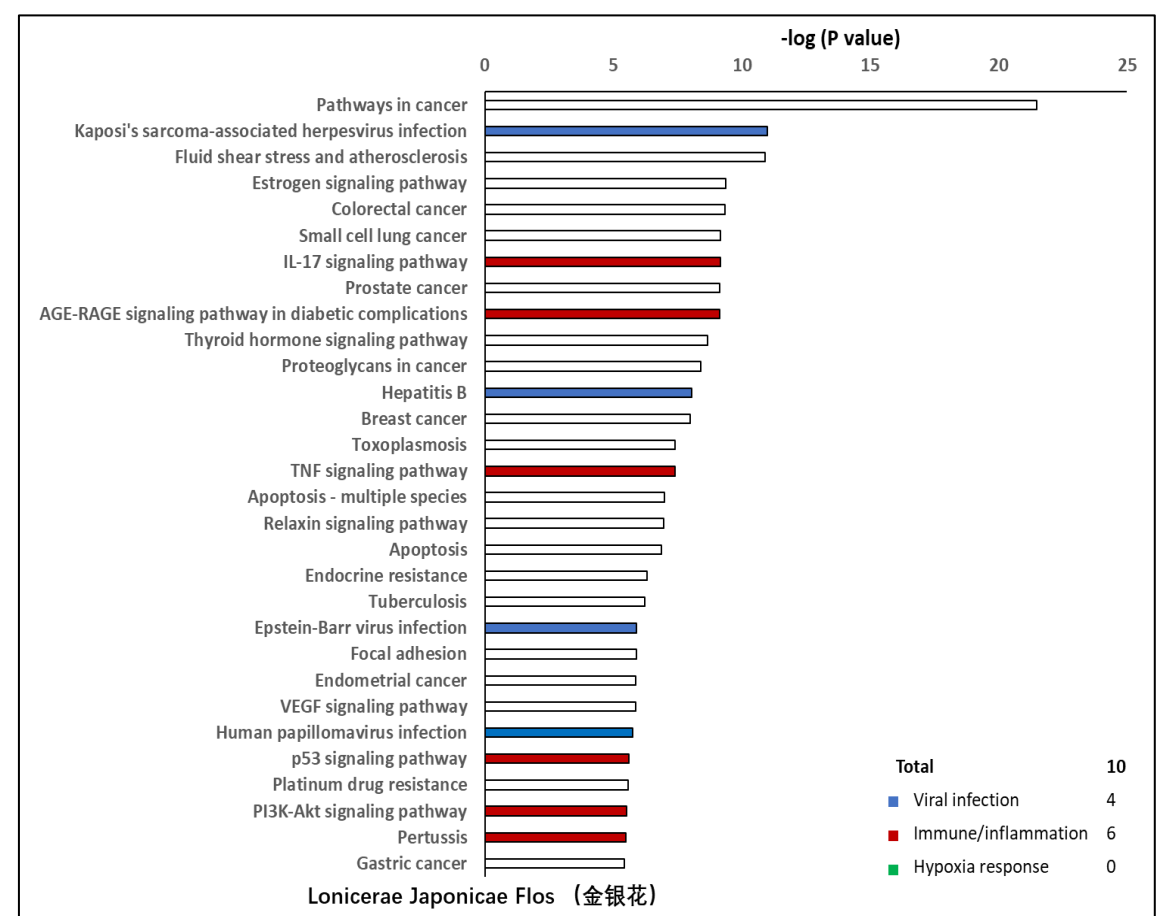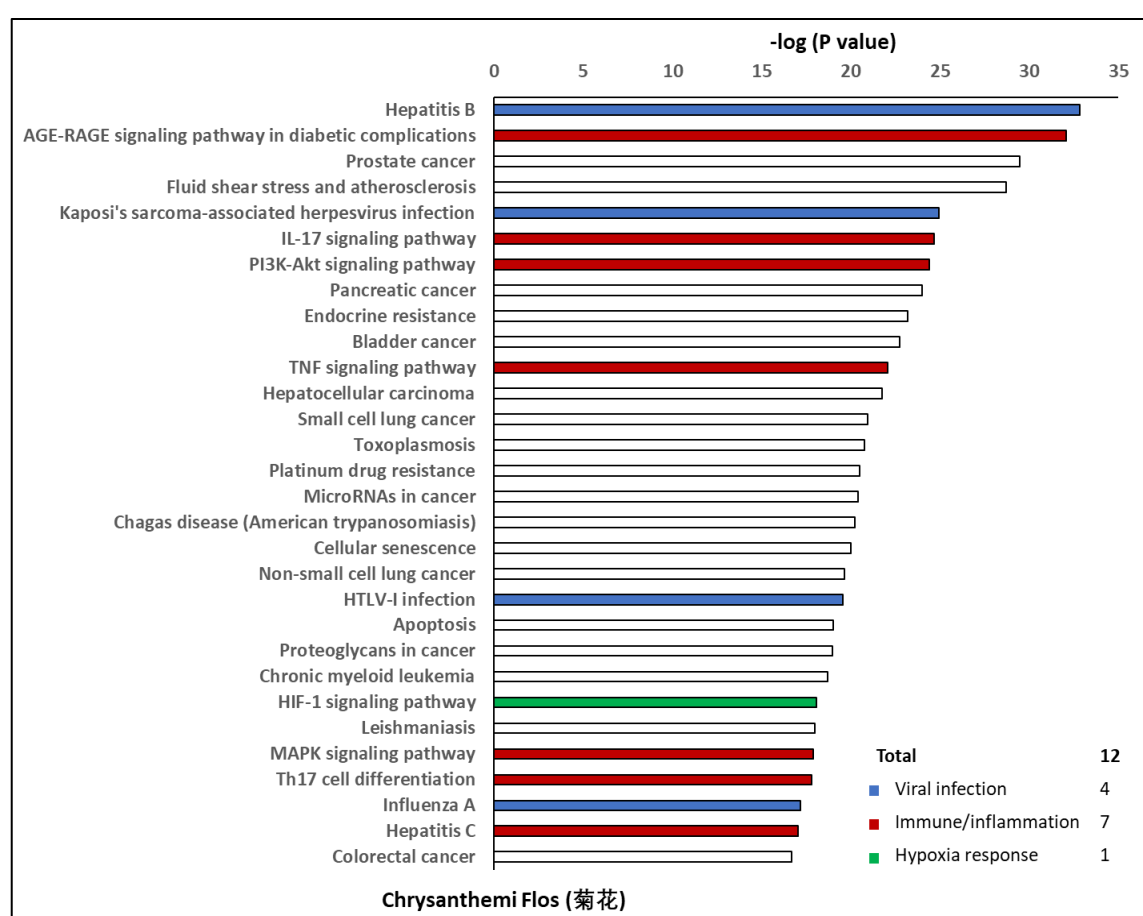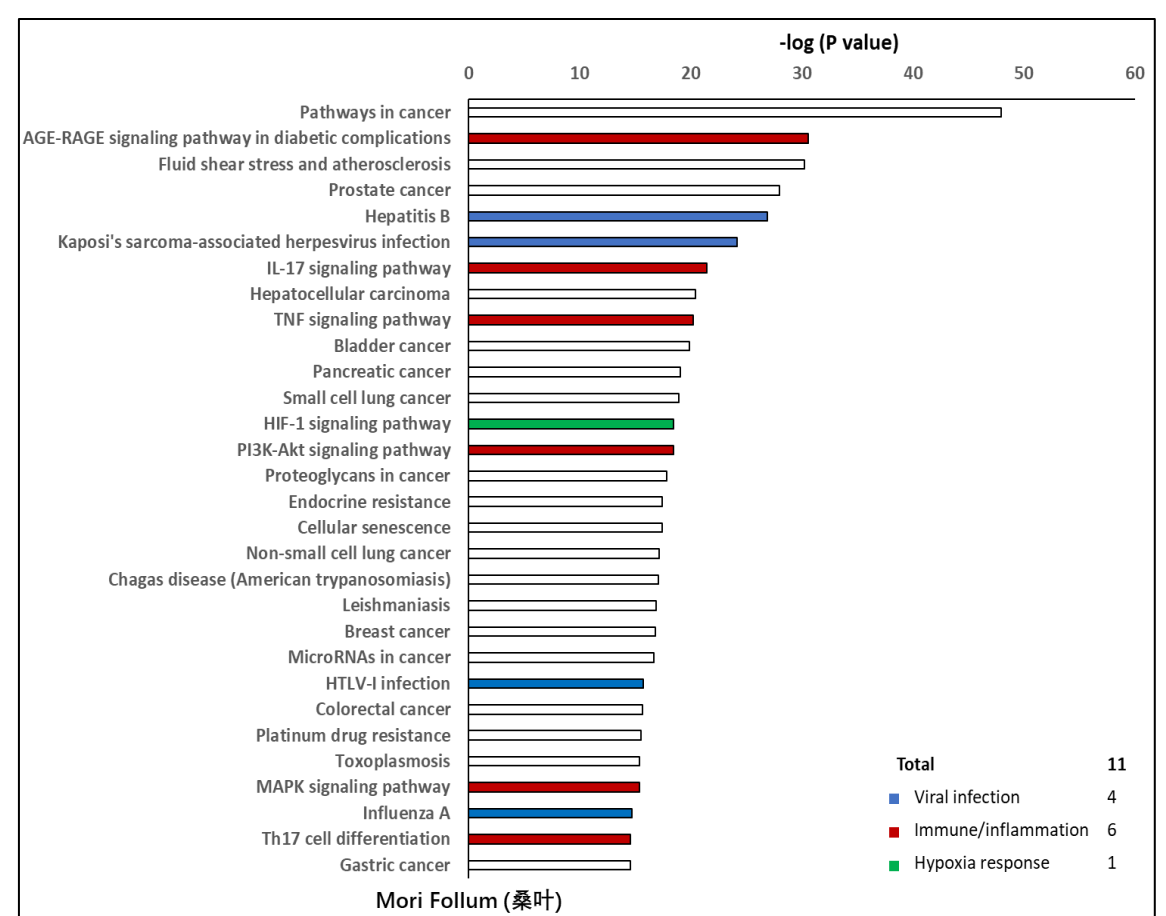

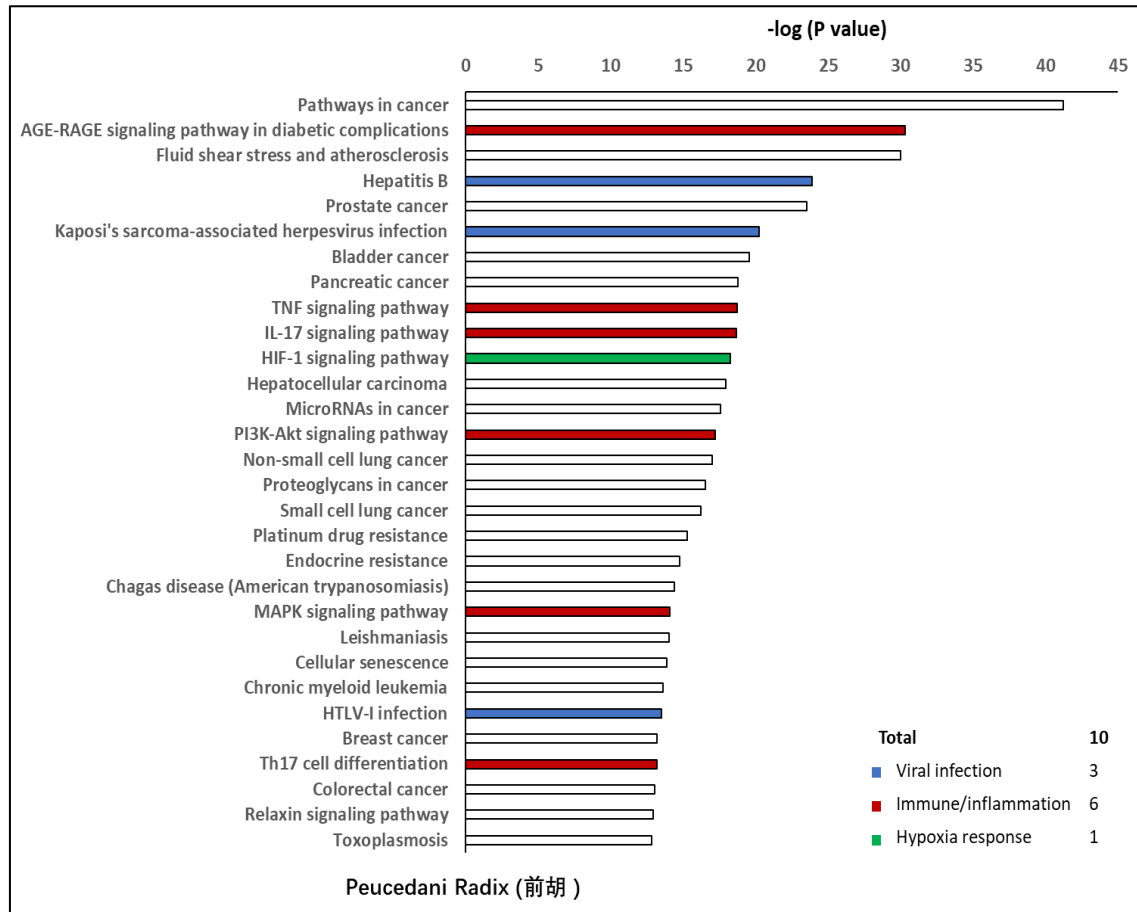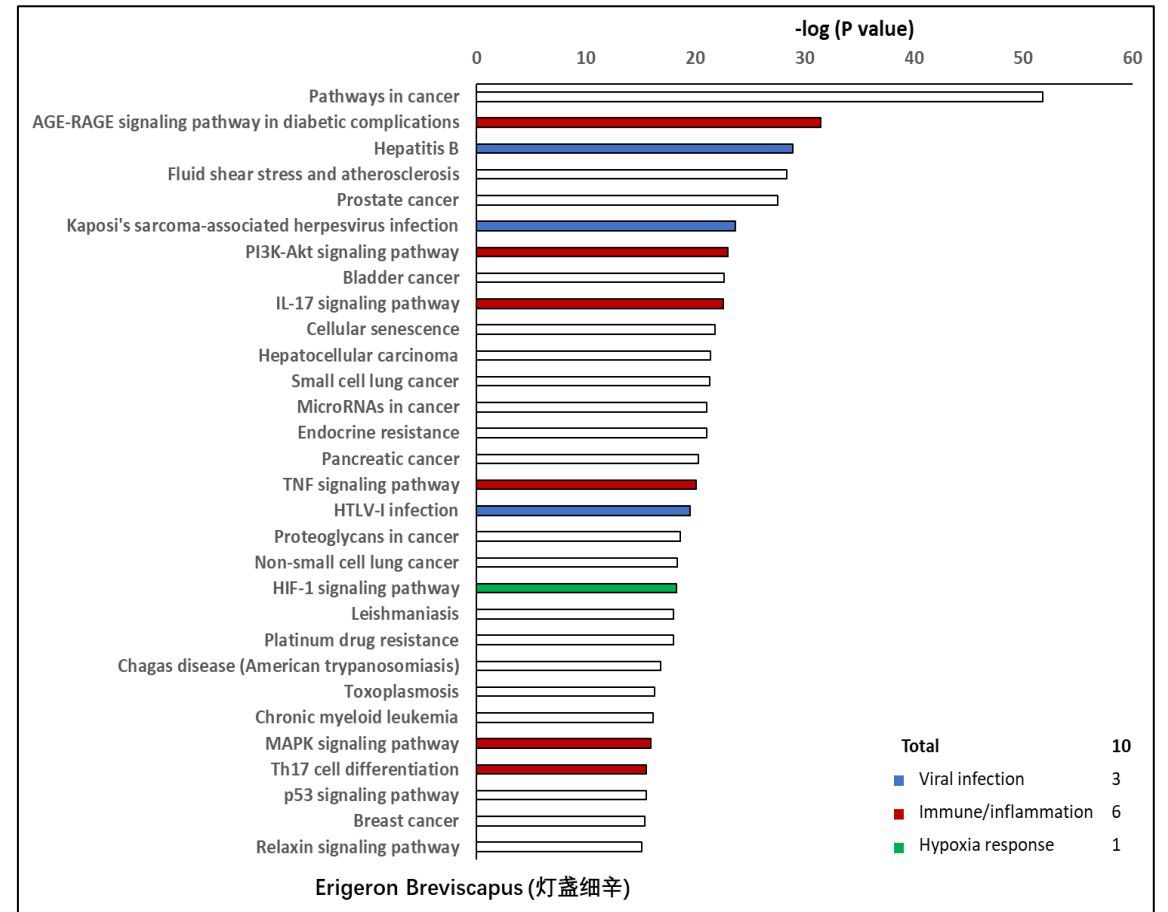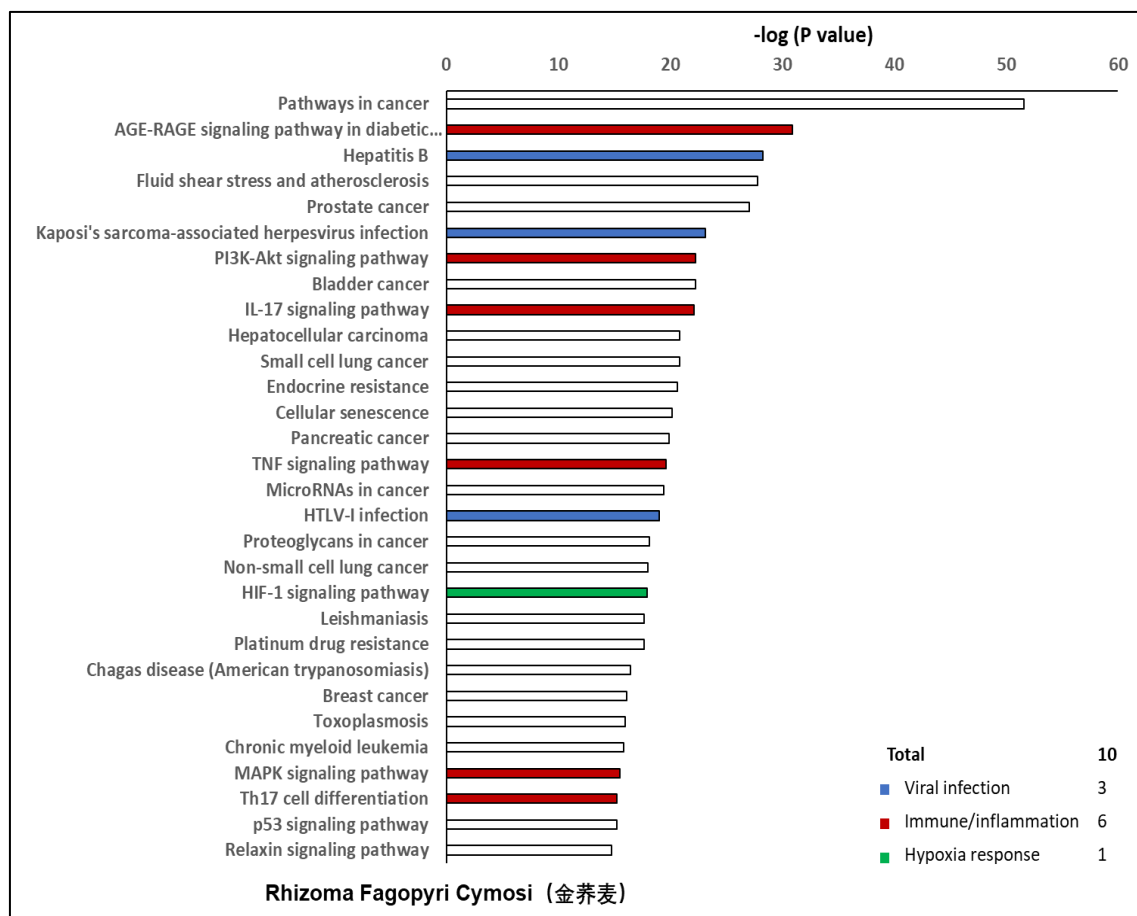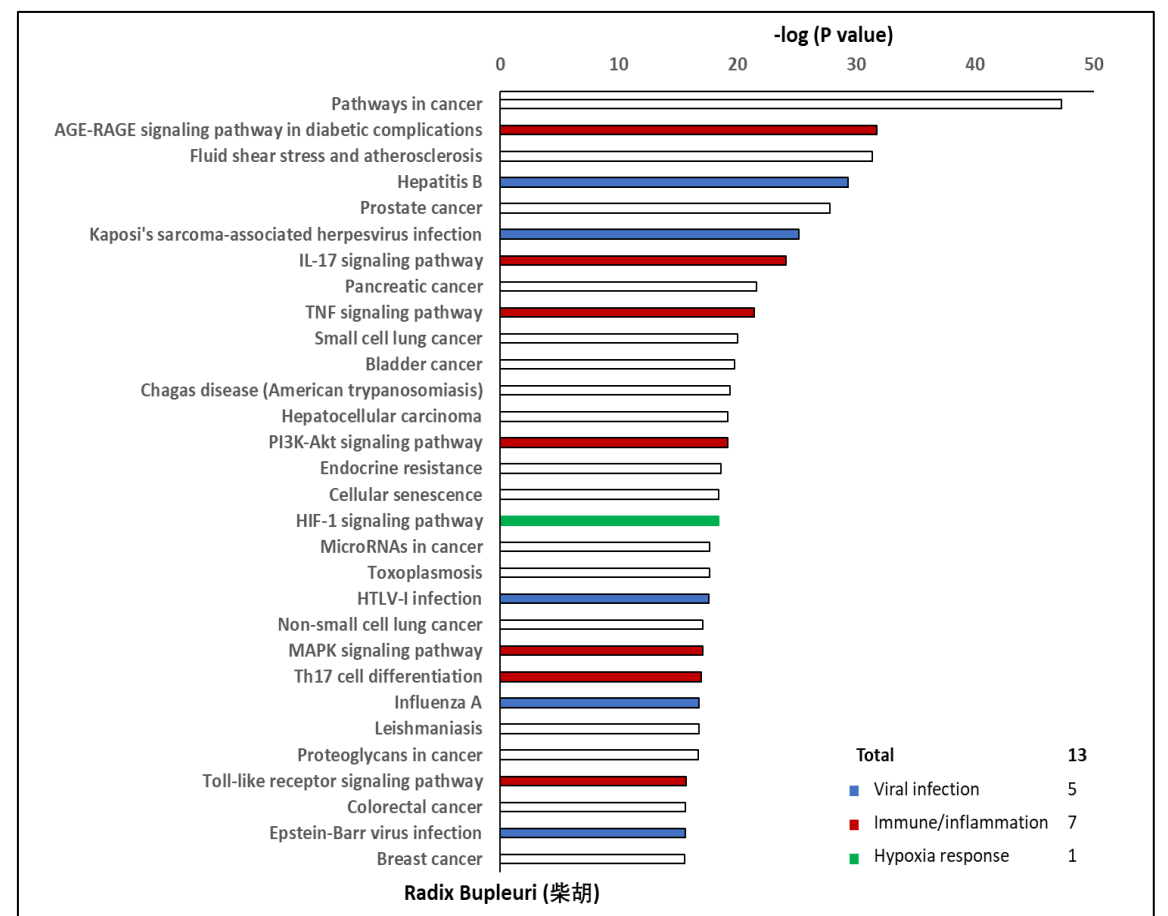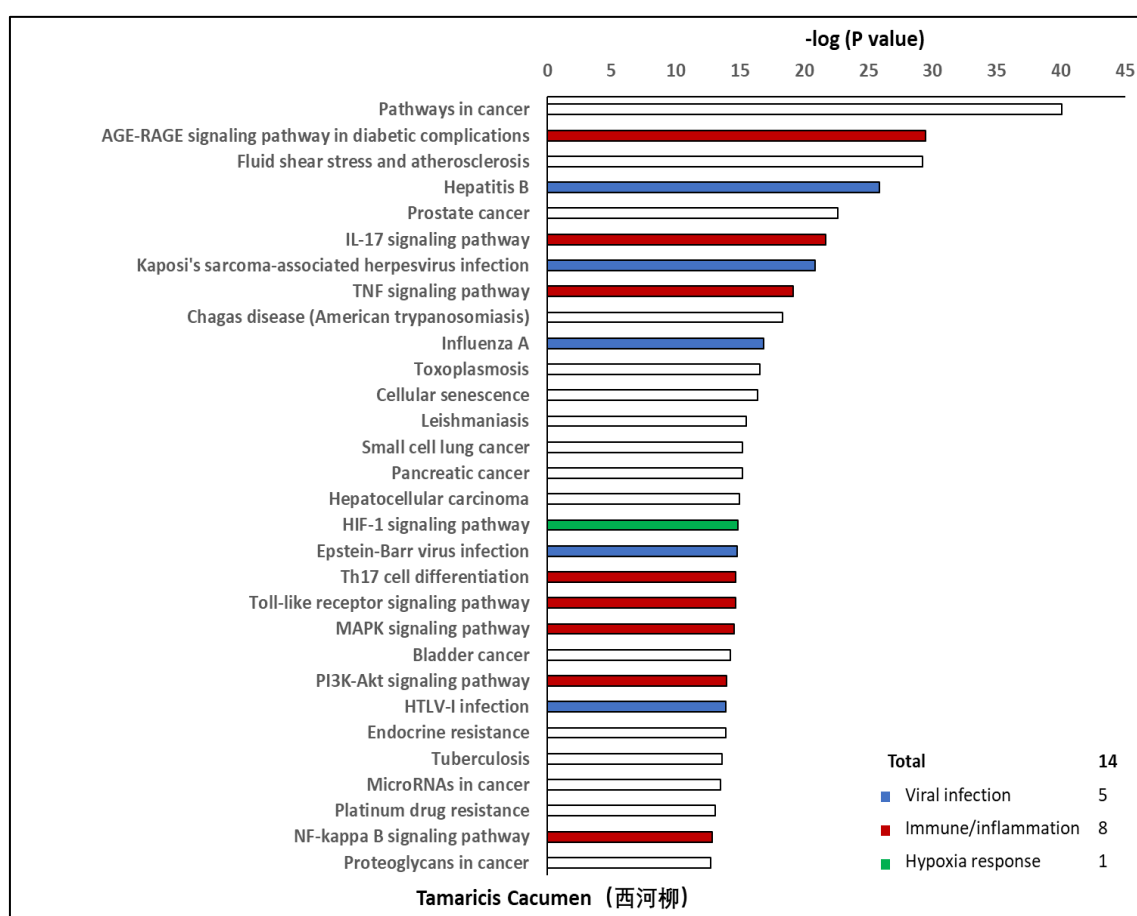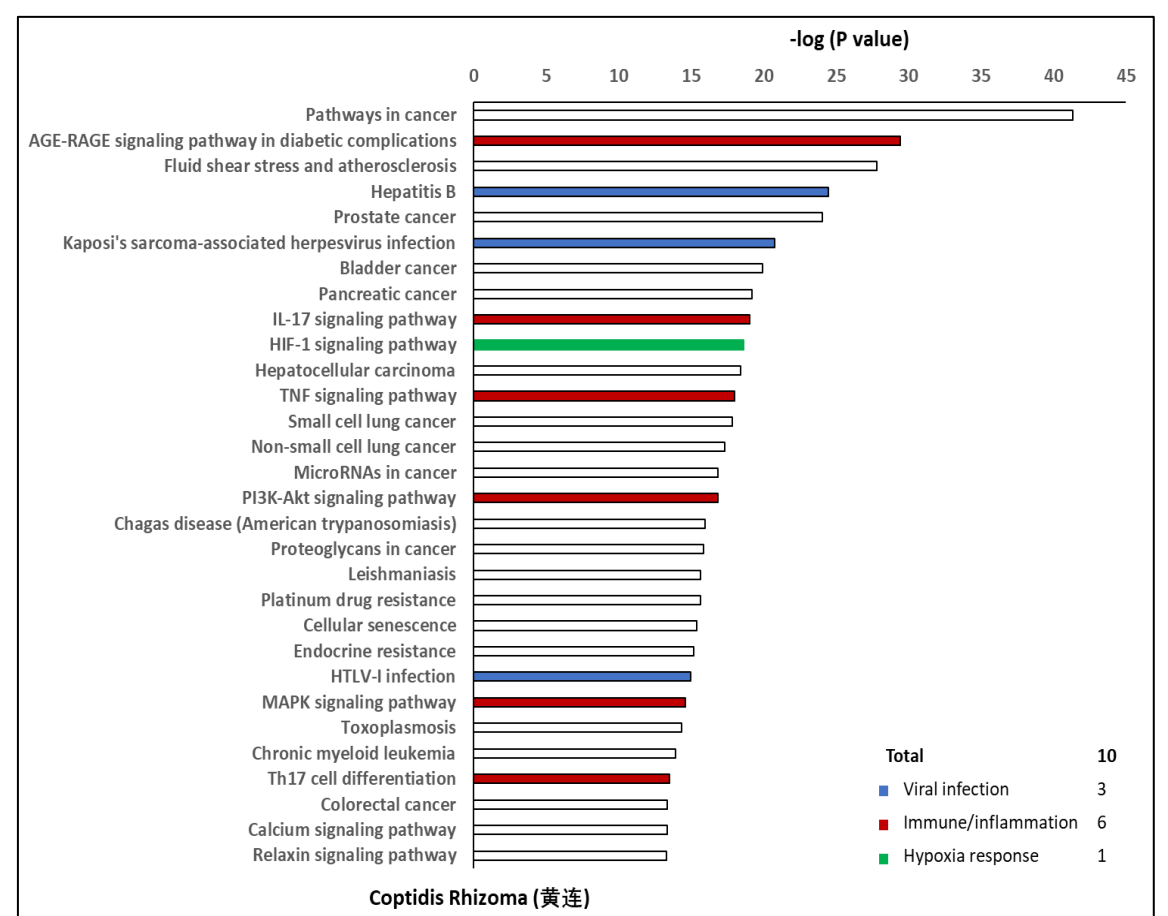

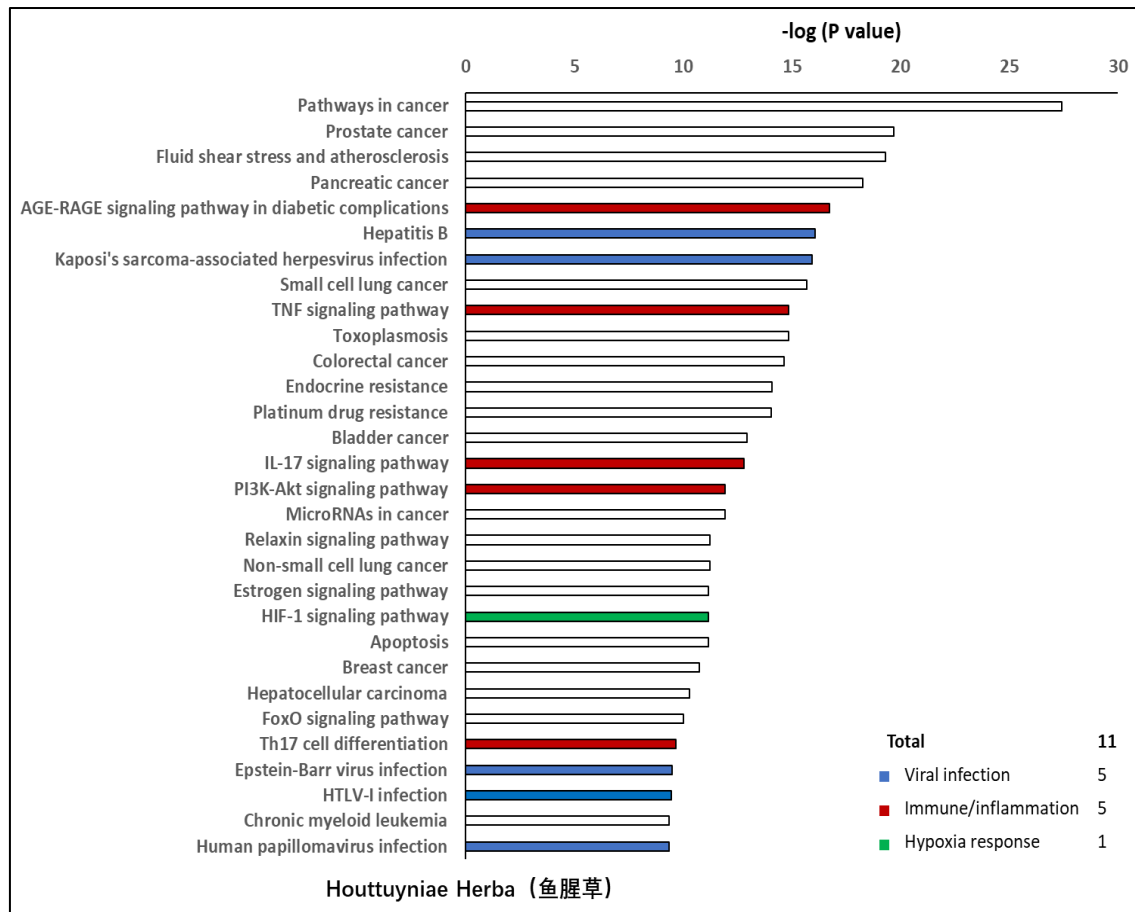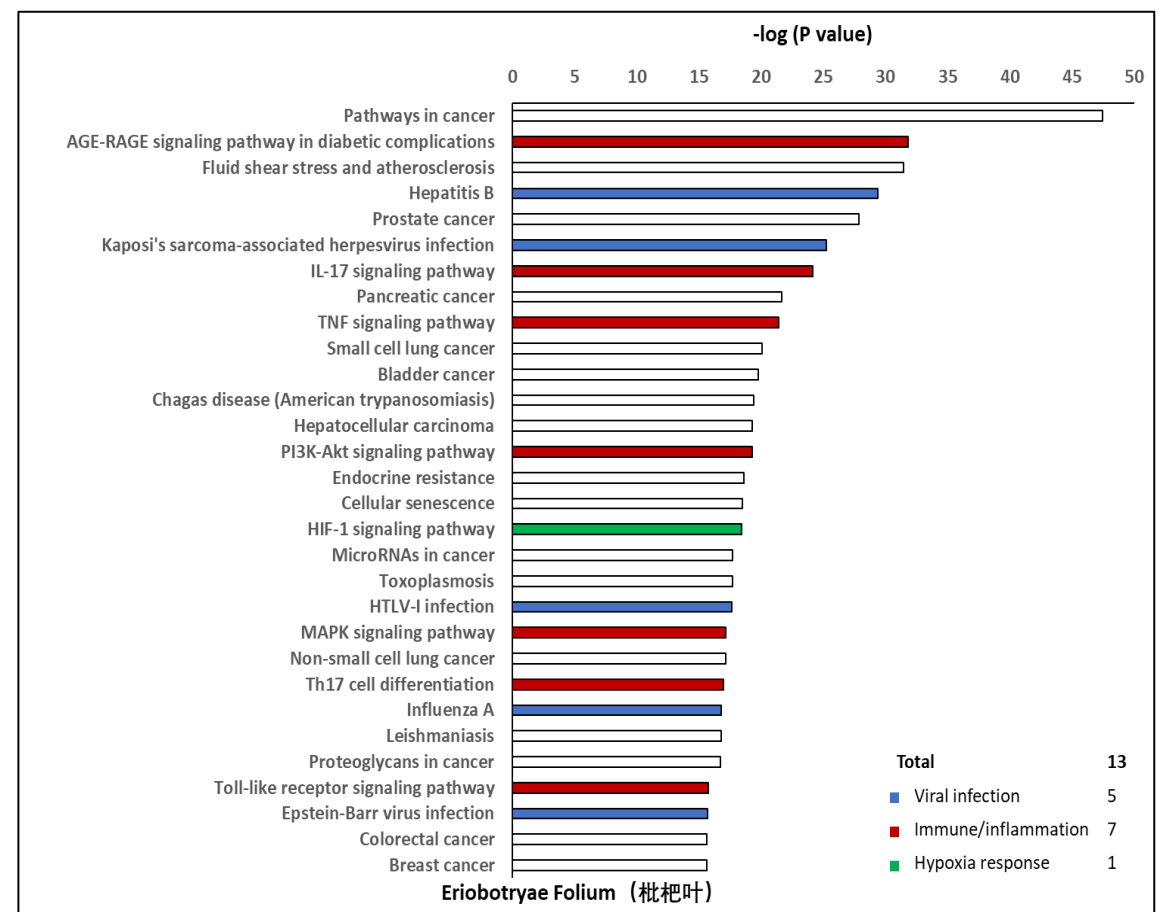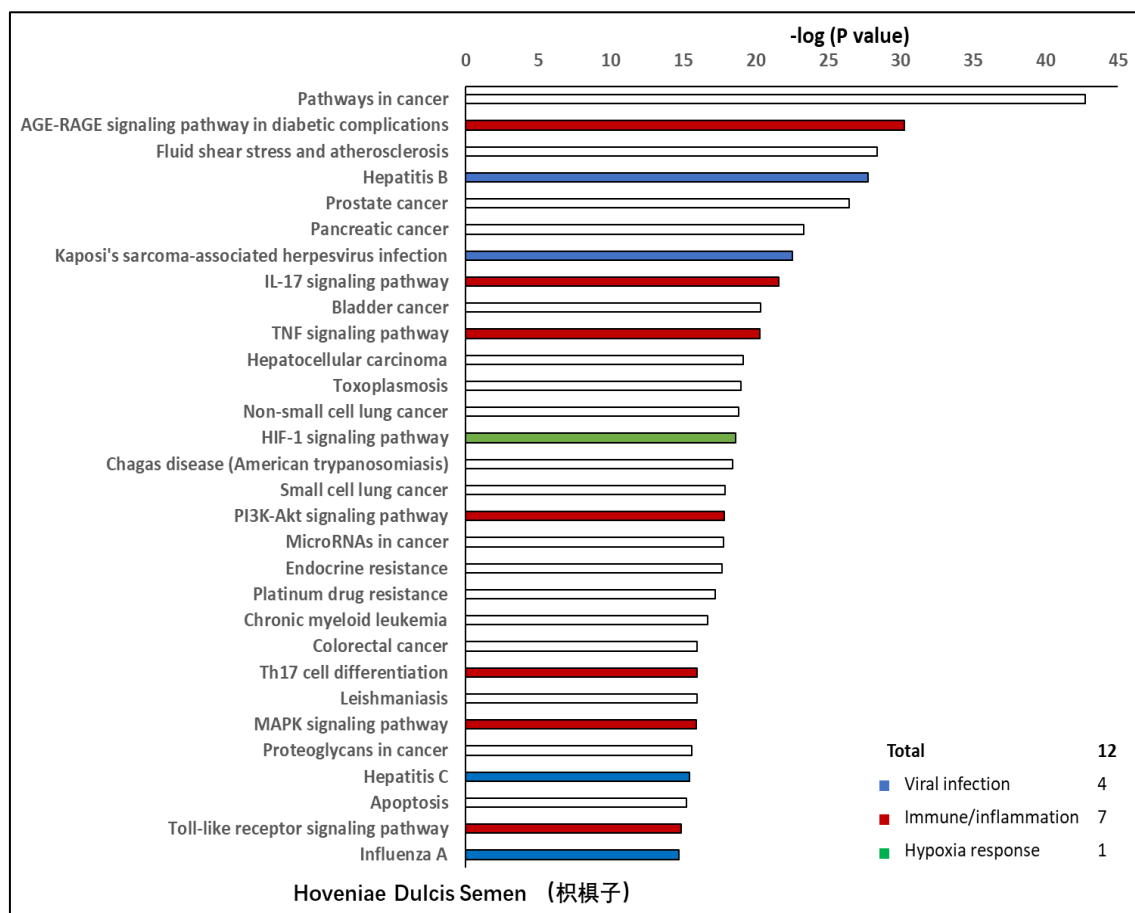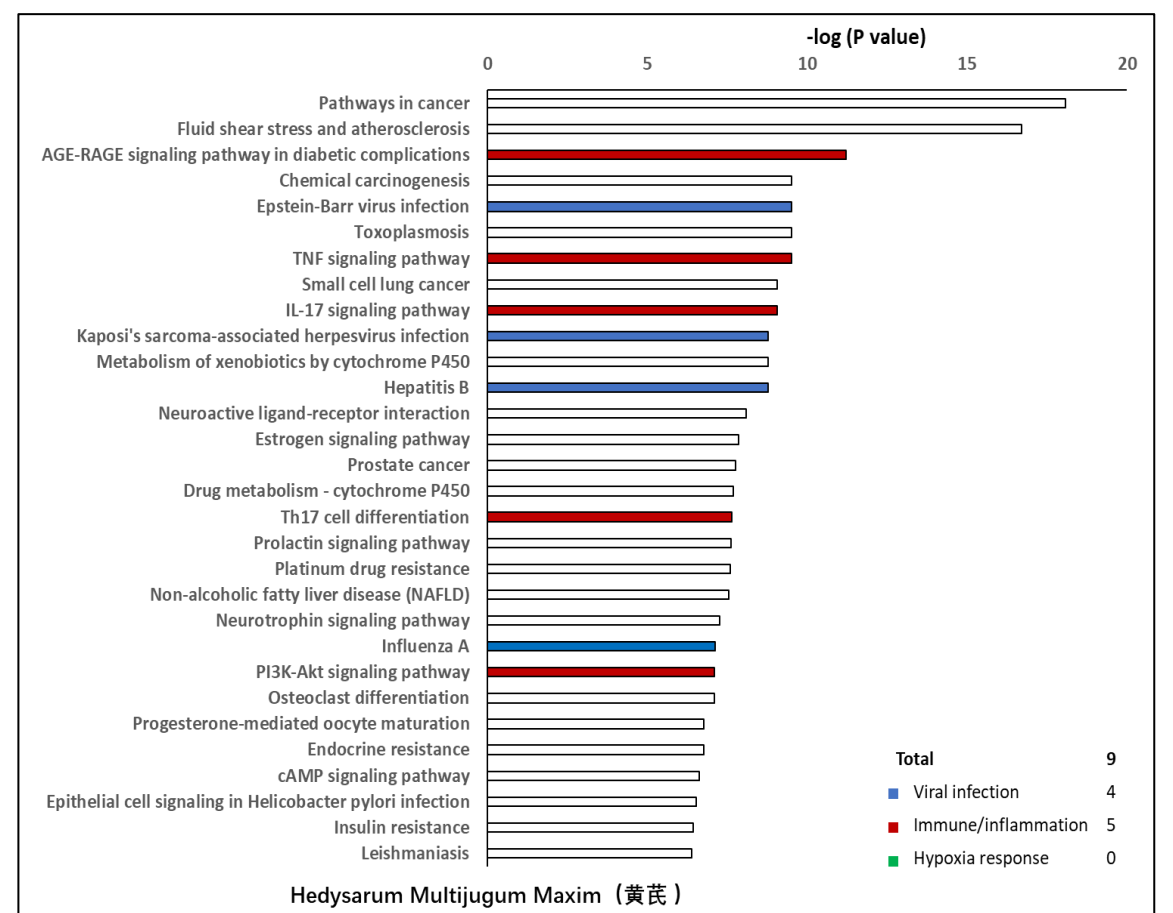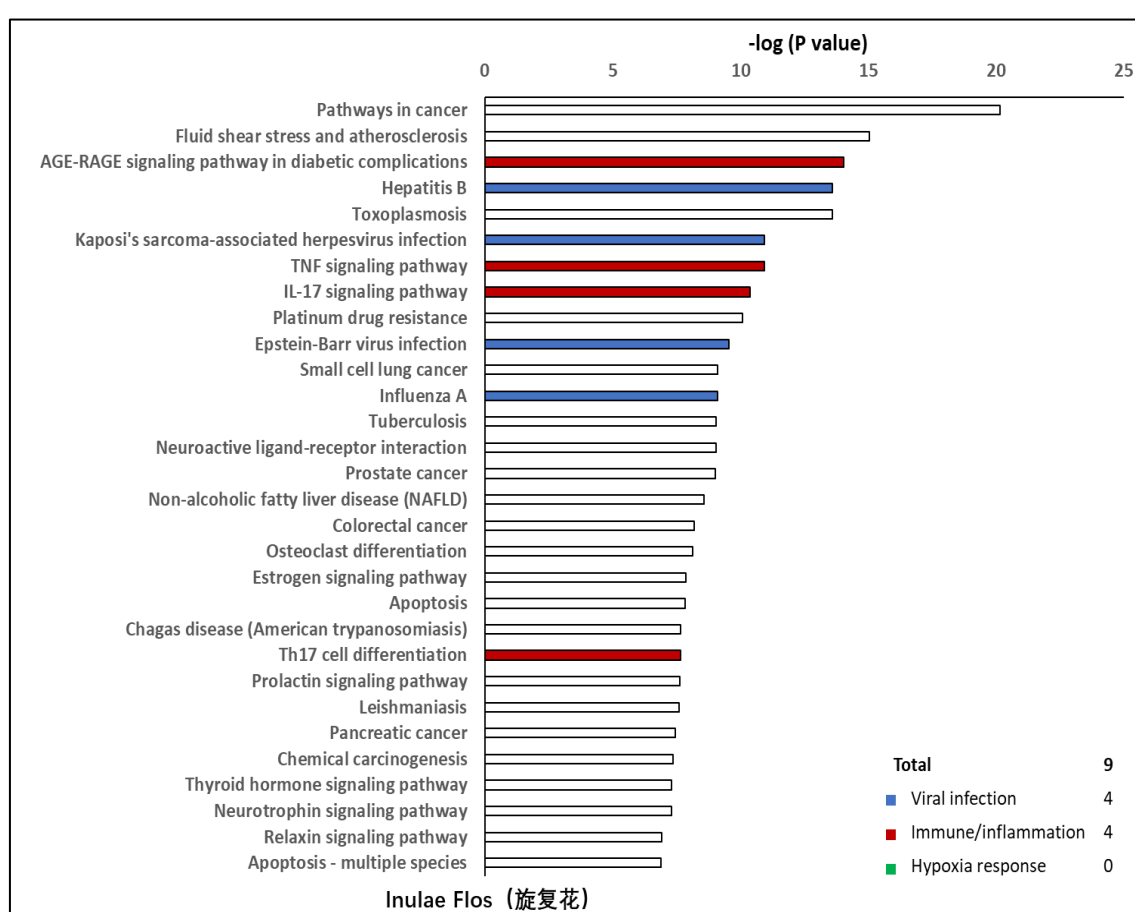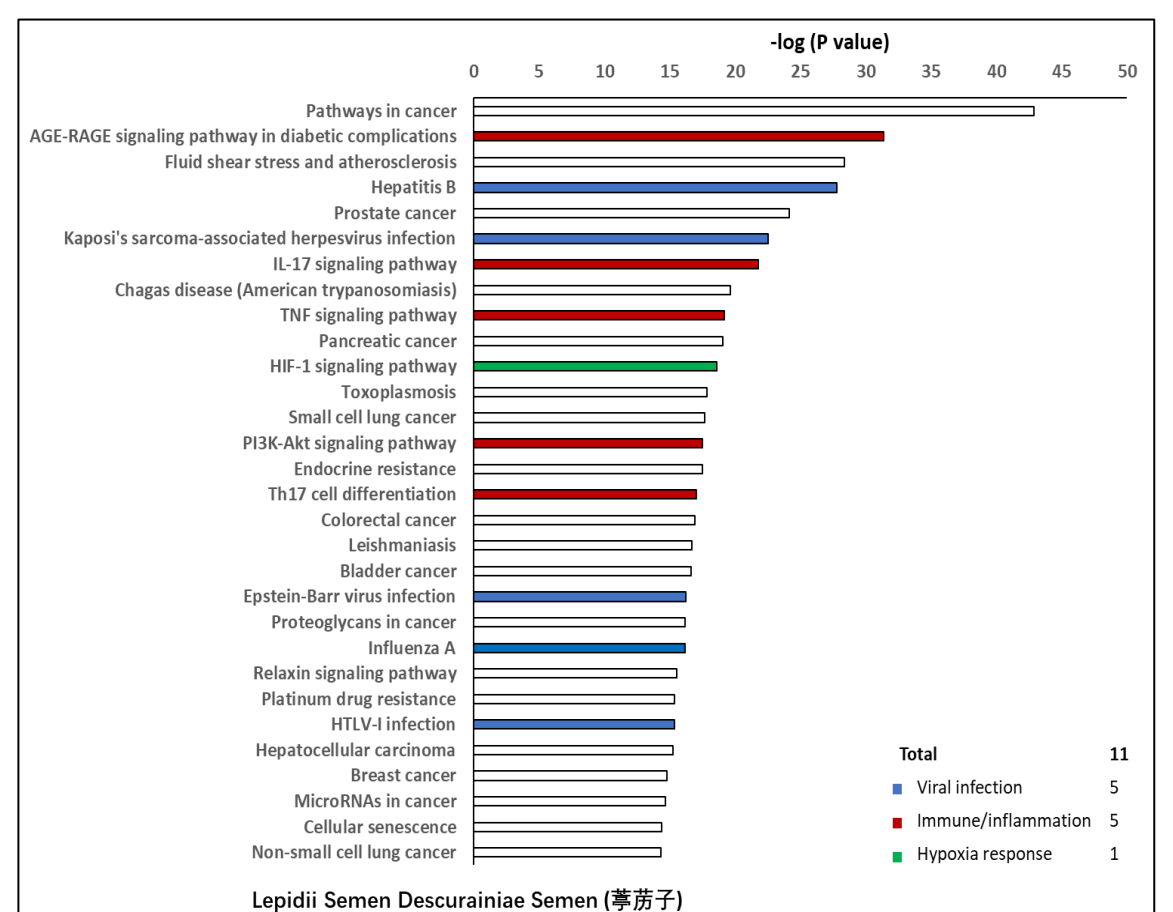

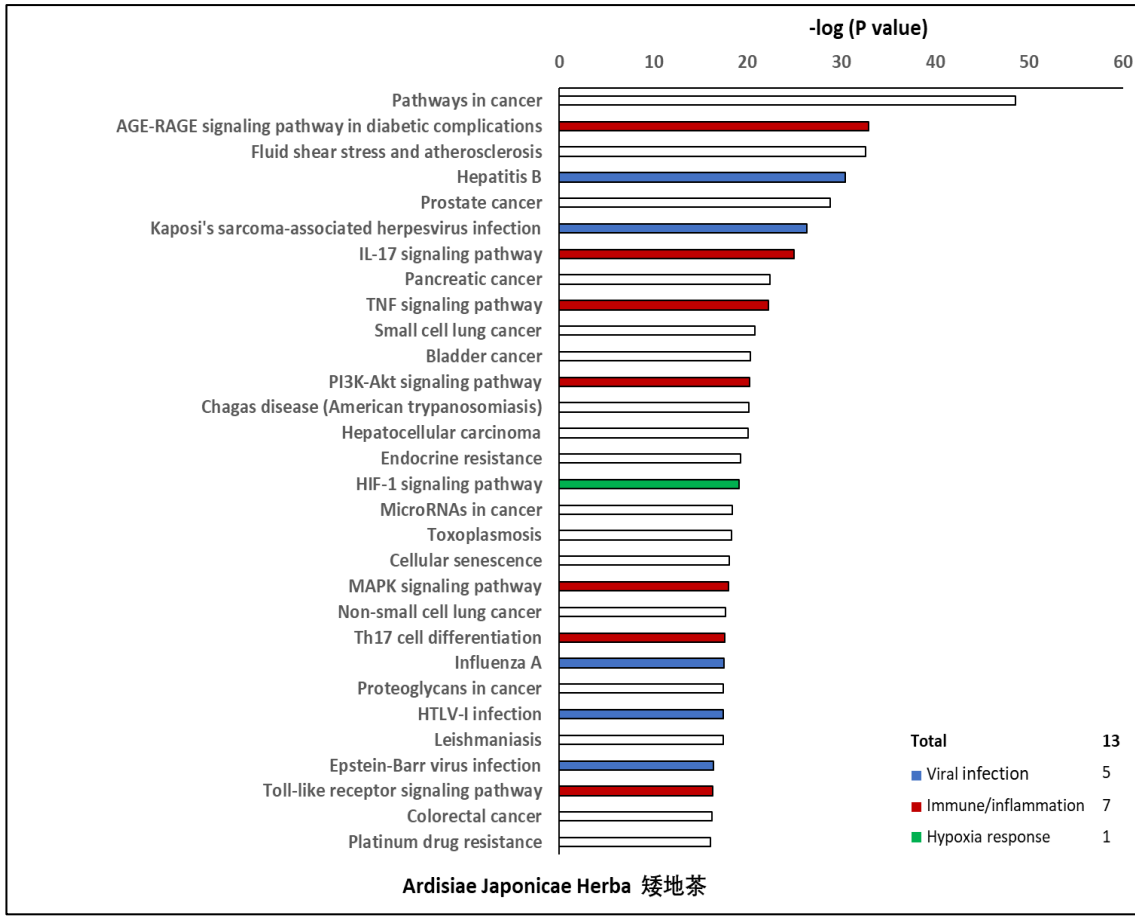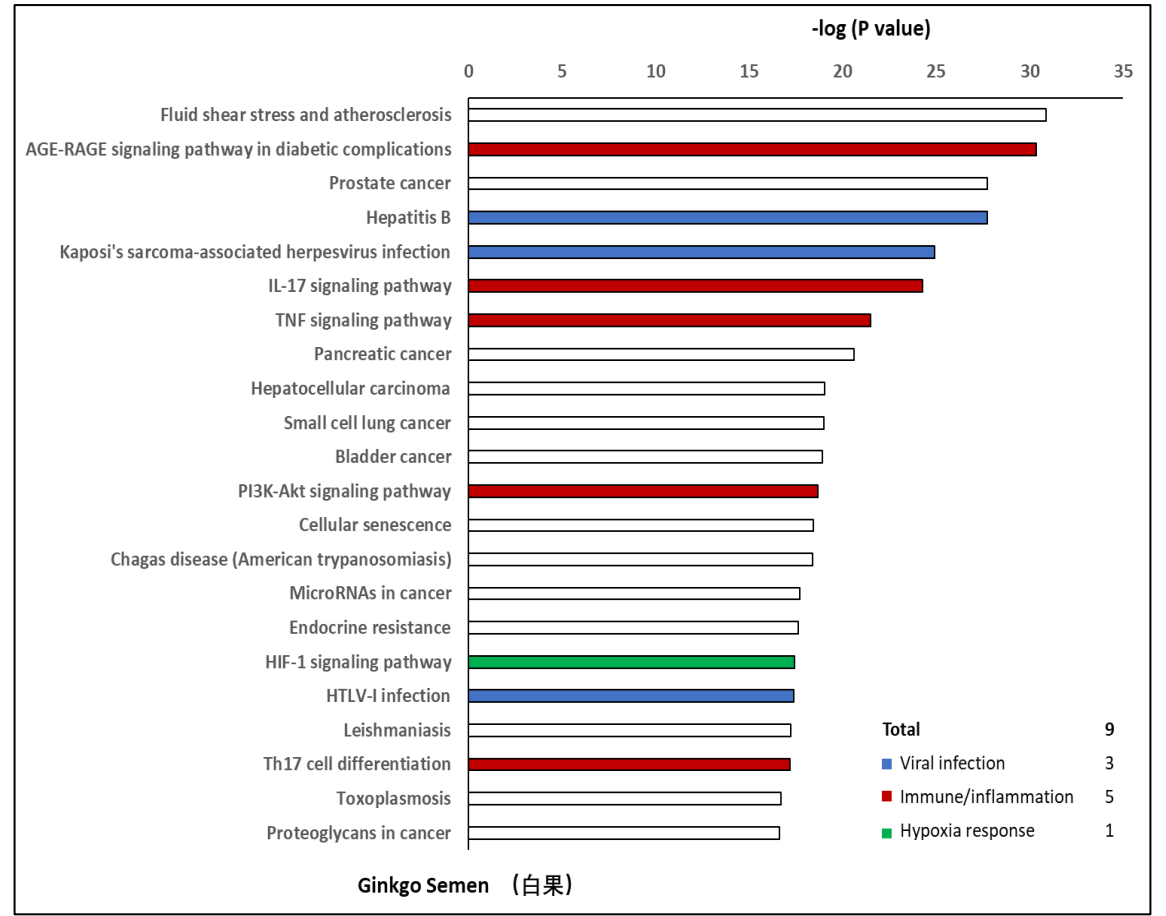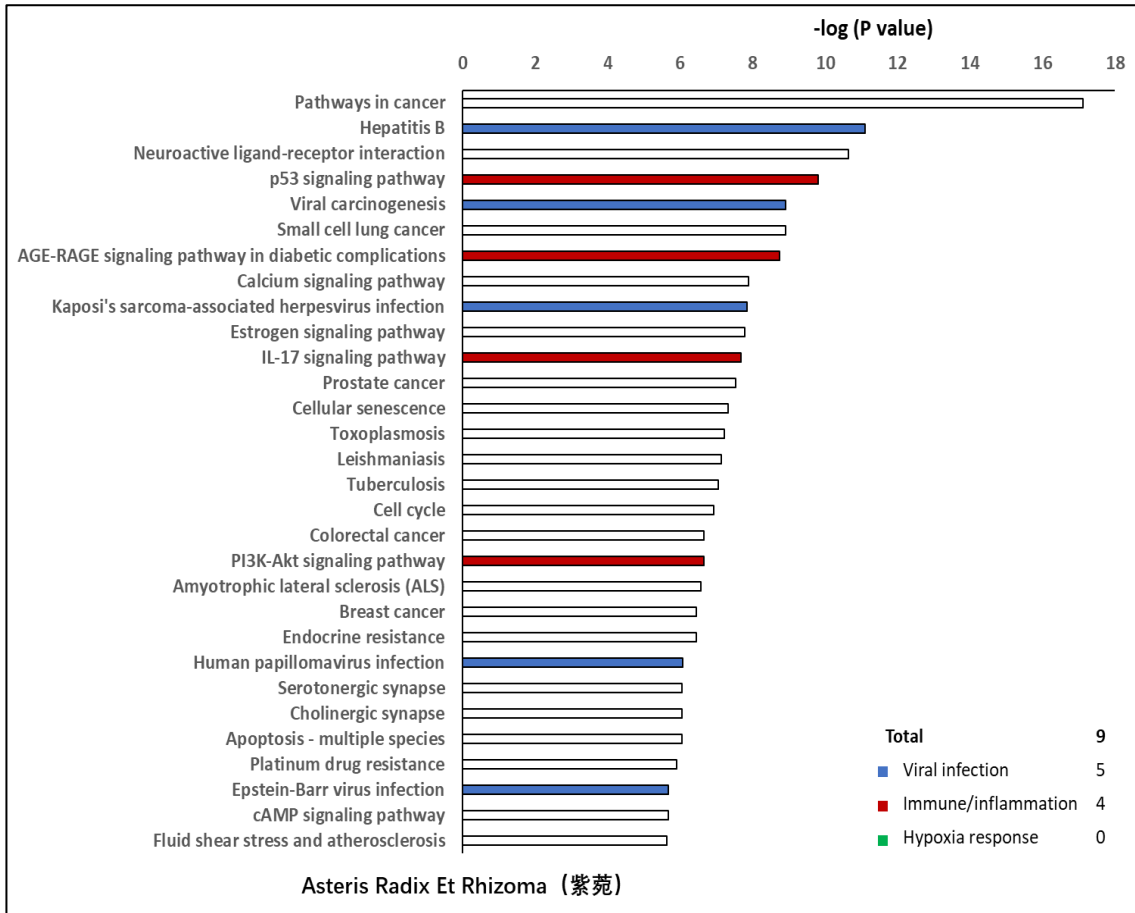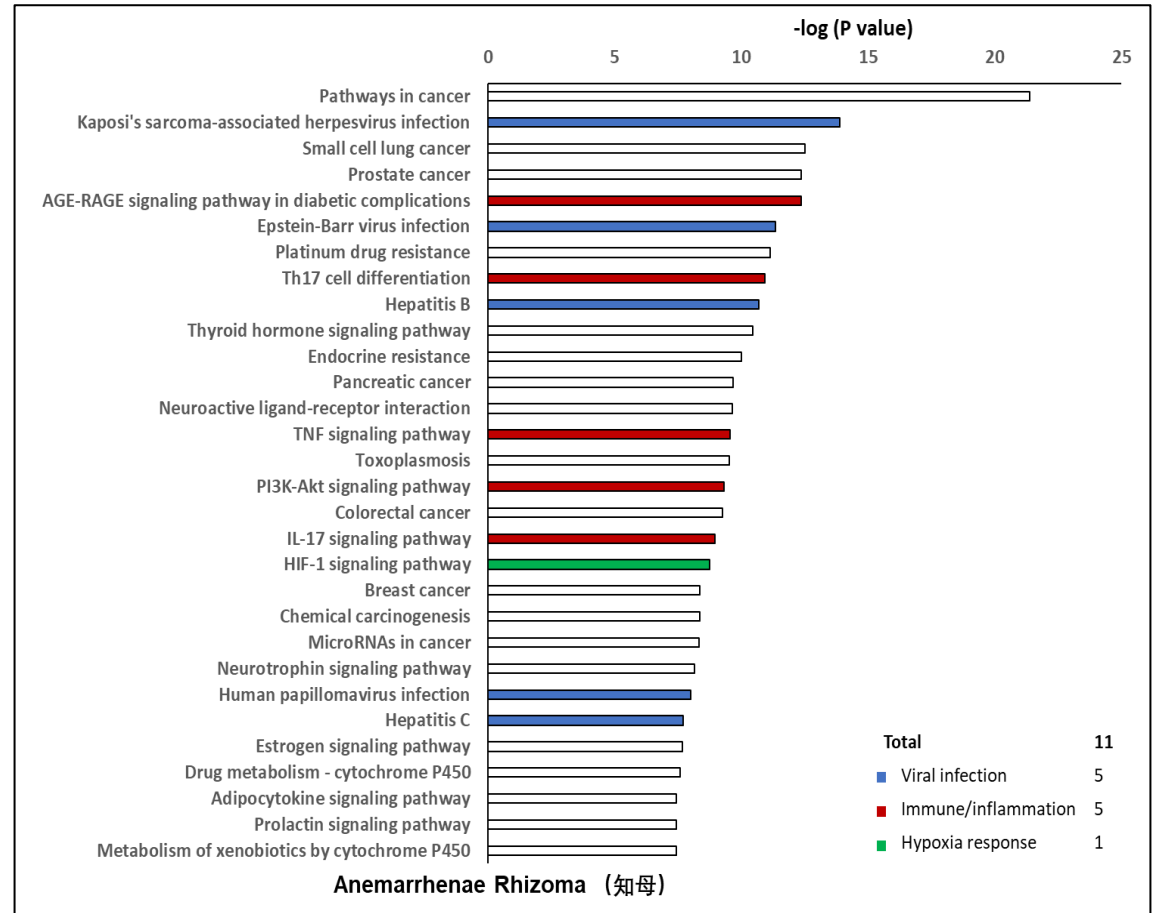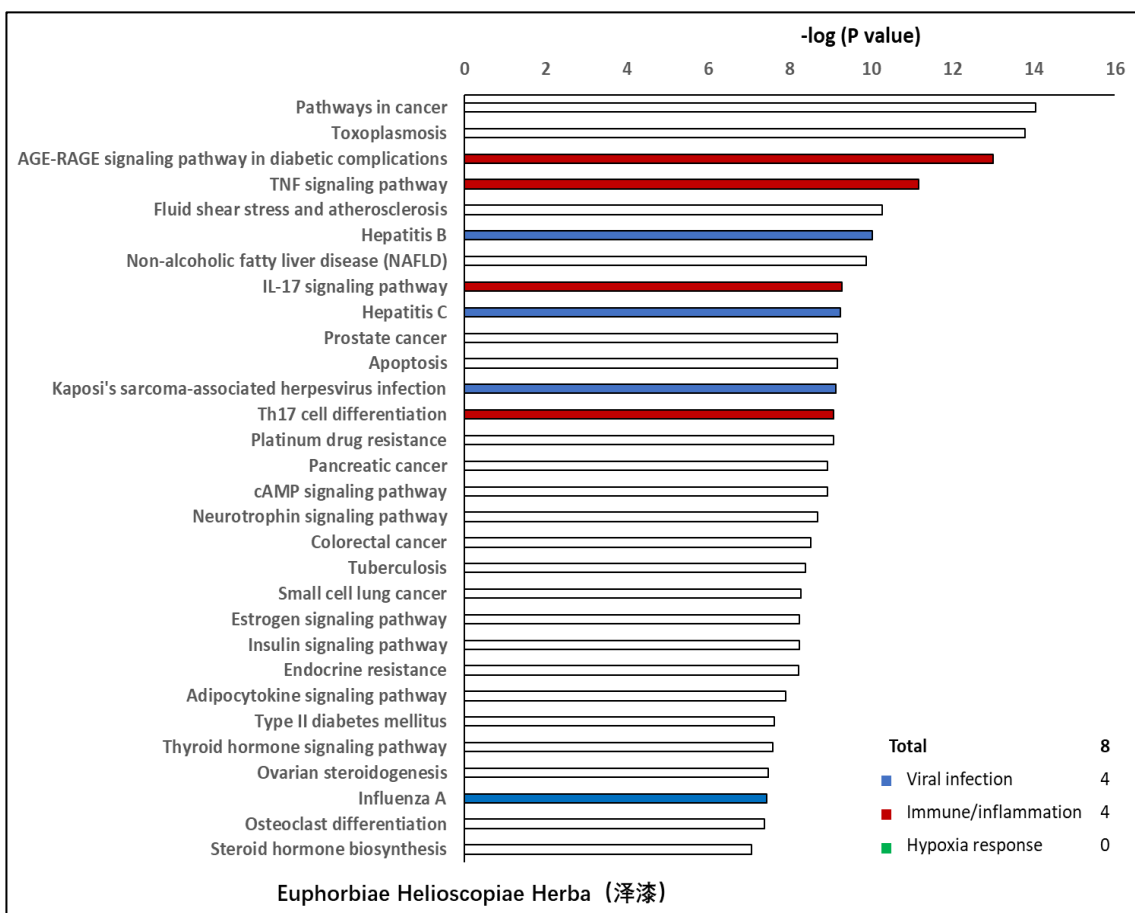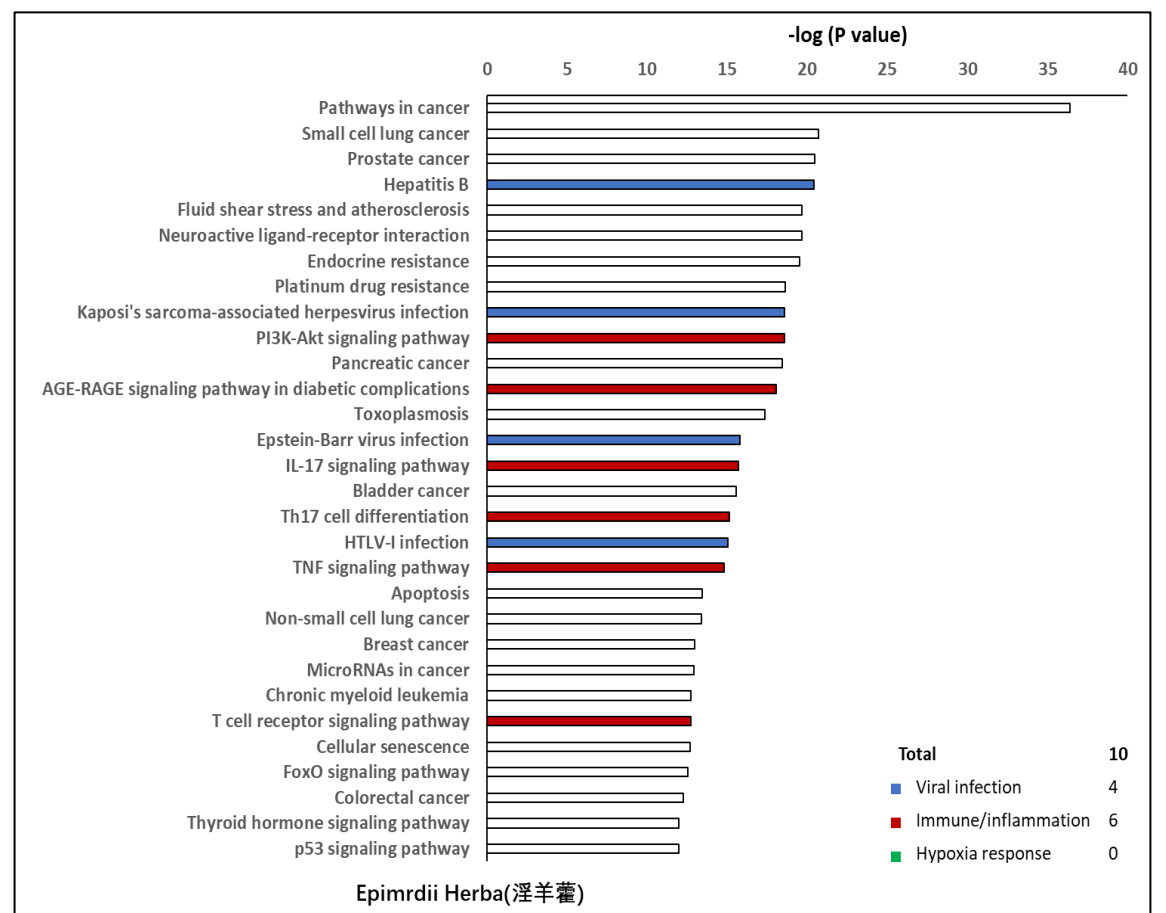

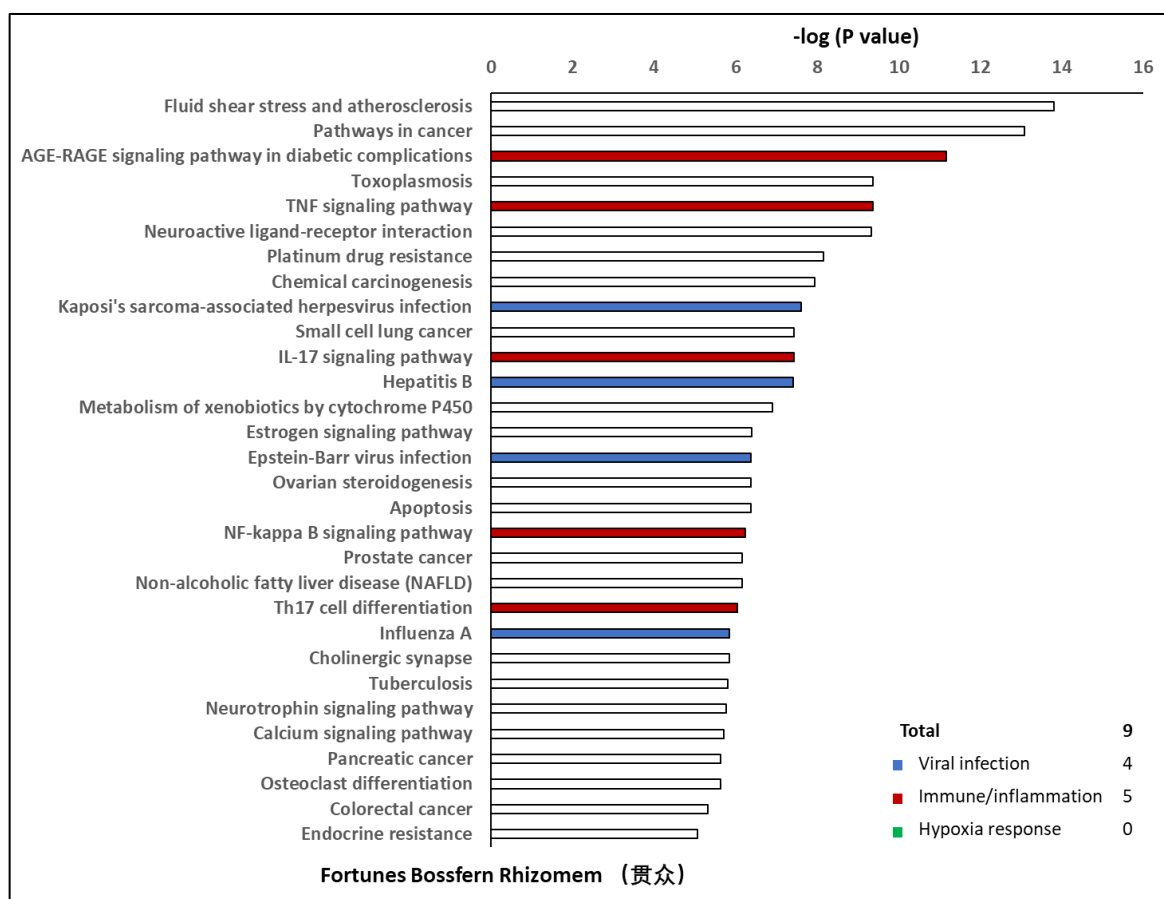

**Fig. S2.** Kyoto Encyclopedia of Genes and Genomes pathways enriched for other 25 Chinese herbals screened in network pharmacology analysis. The top 30 pathways are shown. The blue, red and green bars represent the pathways related to viral infection, immune/inflammation response, and oxygen consumption, respectively.
